# Supplementary material for: The Genetic Diversity and Dysfunctionality of Catalase Associated with a Worse Outcome in Crohn’s Disease
Source: MDPI journal article supplement (doi:10.3390/ijms232415881), 2022-12-14
Supplement: s1 [file s1]

## **Supplemental Data 1: Sequences detailed of the CAT gene.**

### *Amplification Primers*

**CAT DOWN**                      ACGTTGGATGCTGCACAAAGGTGTGAATCG

**CAT UP**                              ACGTTGGATGAGGCTCTTCTGGACAAGTAC

### *Extension Primers*

**CAT EXT**                            TGTGAATCGCATTCTTAGGCT

### *Amplification and Extension Primers of the internal controls*

**ACTB-6 UP**                            ACGTTGGATGTGAACCCCAAGGCCAACCG

**ACTB-6 DOWN**                      ACGTTGGATGGGGTGTGAAGGTCTCAAAC

**ACTB-6 EXT**                            CTCAAACATGATCTGGGTC

**GAPDH-6 UP**                            ACGTTGGATGCCCTGTTGCTGTAGCCAAAT

**GAPDH-6 DOWN**                      ACGTTGGATGCAACGACCACTTTGTCAAGC

**GAPDH-6 EXT**                            tttTCAAGCTCATTTCTGTTATG

**HMBS-7 UP**                            ACGTTGGATGAGAGAAAGTTCCCGCATCTG

**HMBS-7 DOWN**                      ACGTTGGATGAAGCCGGGTGTTGAGGTTTC

**HMBS-7 EXT**                            gatGTTTCCCGAATACTCC

### *Competitor Sequences*

#### **CAT comp**

CTGCACAAAGGTGTGAATCGCATTCTTAGGCTaCTCAGCATTGTACTTGTCCAGAAGAGCCT

### *Competitor Sequences of the internal controls*

#### **ACTB-6 comp**

GGGTGTTGAAGGTCTCAAACATGATCTGGGTCtCTTCTCGCGGTTGGCCTTGGGGTTCA

#### **GAPDH-6 comp**

CCCTGTTGCTGTAGCCAAATTCGTTGaCATAACCAGGAAATGAGCTTGACAAAGTGGTCGTTG

#### **HMBS-7 comp**

AAGCCGGGTGTTGAGGTTTCCCGAATACTCCaGAACTCCAGATGCGGGAACTTTCTCT
